# Supplementary material for: Social Inequalities in Early Antidepressant Discontinuation
Source: Atypon-hosted journal article supplement (doi:10.1176/appi.ps.201300184), 2014-02-03
Supplement: 618_ds001.pdf [file 618_ds001.pdf]

## Appendix 1 Antipsychotics included in the study

---

| ATC Code <sup>a</sup> |                |
|-----------------------|----------------|
| N05AL05               | Amisulpride    |
| N05AX12               | Aripiprazole   |
| N05AH02               | Clozapine      |
| N05AH03               | Olanzapine     |
| N05AX08               | Risperidone    |
| N05AA01               | Chlorpromazine |
| N05AD08               | Droperidol     |
| N05AF01               | Flupentixol    |
| N05AB02               | Fluphenazine   |
| N05AD01               | Haloperidol    |
| N05AH01               | Loxapine       |
| N05AG03               | Penfluridol    |
| N05AC01               | Periciazine    |
| N05AB03               | Perphenazine   |
| N05AG02               | Pimozide       |
| N05AD05               | Pipampérone    |
| N05AC04               | Pipotiazine    |
| N05AL01               | Sulpiride      |
| N05AL03               | Tiapride       |
| N05AF05               | Zuclopenthixol |

---

<sup>a</sup>ATC: anatomical-therapeutic-chemical

**Appendix 2** Percentage of the cohort members who discontinued their antidepressant treatment according to various definition of early discontinuation (Marseilles, France – n=14518 individuals)

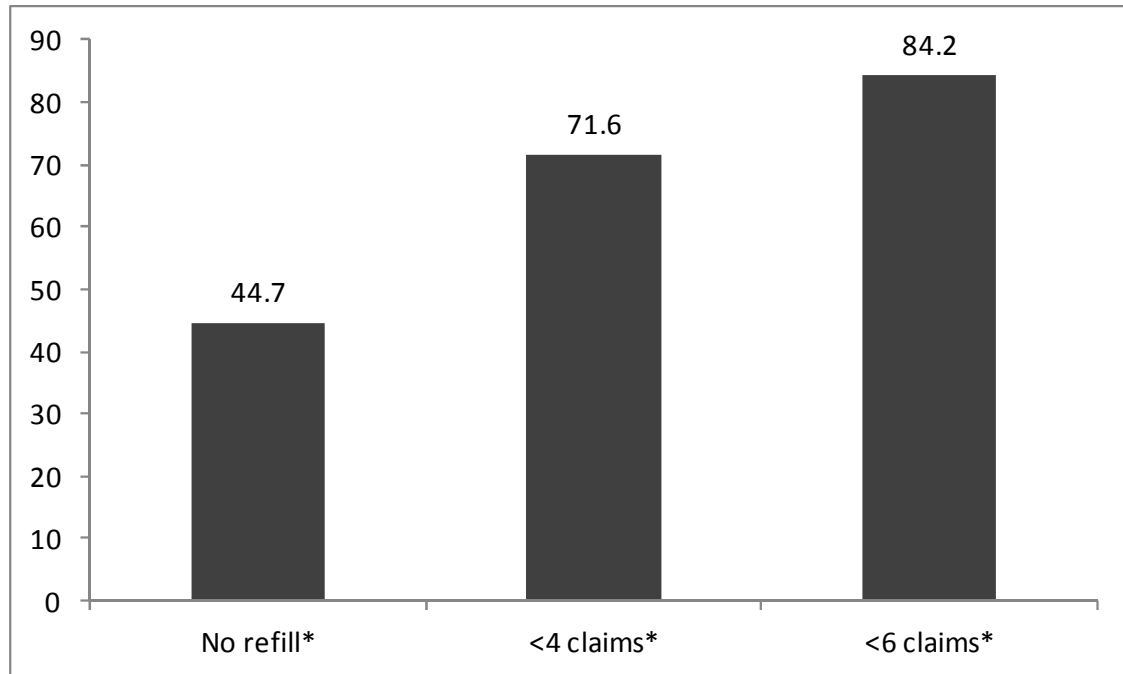

\* within the 6 months following the new antidepressant treatment.

**Appendix 3** Individual and prescriber factors associated with early discontinuation of antidepressant treatment: results of the sensitivity analysis using an interval defining a new antidepressant treatment as 1 year without antidepressant treatment (Marseilles, France – n=5998 individuals; n=1130 prescribers)

|                                                                        | <i>n</i> | Adjusted RR <sup>a</sup> | 95% CIs <sup>a</sup> |
|------------------------------------------------------------------------|----------|--------------------------|----------------------|
| <b>Individual level</b>                                                |          |                          |                      |
| CMUC coverage <sup>b</sup> (reference: no)                             | 1296     | 1.11                     | 1.07-1.15            |
| Type of antidepressant treatment (reference: SSRIs <sup>c</sup> )      |          |                          |                      |
| <i>Tricyclics and monoamine oxidase inhibitors</i>                     | 477      | 1.15                     | 1.08-1.20            |
| <i>Miscellaneous other antidepressants</i>                             | 1604     | 1.04                     | 1.00-1.08            |
| <i>Other cases (≥ 2 types of antidepressant)</i>                       | 24       | 1.02                     | .69-1.23             |
| <b>Prescriber level</b>                                                |          |                          |                      |
| Percentage of CMUC-covered patients <sup>b</sup> (%,<br>reference: <5) |          |                          |                      |
| 5-23                                                                   | 2948     | 1.02                     | .94-1.09             |
| >23                                                                    | 2215     | 1.09                     | .98-1.19             |

<sup>a</sup> Estimated odds ratio were corrected with the method of Zhang and Yu to estimate relative risks (RR) with their 95% confidence intervals (CIs). Results of multilevel logistic regression analyses adjusted for 1) individual level: gender, age number of consultations with private general practitioners and psychiatrists in 2008-2009, chronic somatic illness, chronic psychiatric illness, coprescription of antipsychotics and/or lithium, coprescription of anxiolytics and/or hypnotic; 2) prescriber level: gender, age, annual mean expenditure due to medication prescriptions dispensed/patient in 2008-2009, percentage of patients aged 60 years or more, percentage of patients with chronic illness.

<sup>b</sup> CMUC: Couverture maladie universelle complémentaire (Complementary Universal Health Insurance program covering persons with very low income.

<sup>c</sup> SSRIs: Selective serotonin re-uptake inhibitors.

**Appendix 4** Individual and prescriber factors associated with early discontinuation of antidepressant treatment: results of the sensitivity analysis using two different definitions of early discontinuation of new antidepressant treatment (Marseilles, France – n=14518 individuals; n=1437 prescribers)

|                                                                                                                                    | <i>n</i> | Adjusted RR <sup>a</sup> | 95% CIs <sup>a</sup> |
|------------------------------------------------------------------------------------------------------------------------------------|----------|--------------------------|----------------------|
| <b>EARLY DISCONTINUATION = NO ANTIDEPRESSANT REFILL WITHIN THE 6 MONTHS FOLLOWING THE NEW ANTIDEPRESSANT TREATMENT<sup>b</sup></b> |          |                          |                      |
| <b>Individual level</b>                                                                                                            |          |                          |                      |
| CMUC coverage <sup>c</sup> (reference: no)                                                                                         | 3189     | 1.13                     | 1.07-1.18            |
| Type of antidepressant treatment (reference: SSRIs <sup>d</sup> )                                                                  |          |                          |                      |
| <i>Tricyclics and monoamine oxidase inhibitors</i>                                                                                 | 1165     | 1.18                     | 1.10-1.26            |
| <i>Miscellaneous other antidepressants or other cases (≥ 2 types of antidepressant)<sup>e</sup></i>                                | 3831     | 1.02                     | .97-1.07             |
| <b>Prescriber level</b>                                                                                                            |          |                          |                      |
| Percentage of CMUC-covered patients <sup>c</sup> (%; reference: <5)                                                                |          |                          |                      |
| 5-23                                                                                                                               | 7164     | 1.09                     | 1.00-1.18            |
| >23                                                                                                                                | 5348     | 1.27                     | 1.13-1.41            |
| <b>EARLY DISCONTINUATION = &lt;6 CLAIMS WITHIN THE 6 MONTHS FOLLOWING THE NEW ANTIDEPRESSANT TREATMENT<sup>b</sup></b>             |          |                          |                      |
| <b>Individual level</b>                                                                                                            |          |                          |                      |
| CMUC coverage <sup>c</sup> (reference: no)                                                                                         | 3189     | 1.07                     | 1.06-1.09            |
| Type of antidepressant treatment (reference: SSRIs <sup>d</sup> )                                                                  |          |                          |                      |
| <i>Tricyclics and monoamine oxidase inhibitors</i>                                                                                 | 1165     | 1.09                     | 1.07-1.11            |
| <i>Miscellaneous other antidepressants</i>                                                                                         | 3755     | 1.02                     | 1.00-1.03            |
| <i>Other cases (≥ 2 types of antidepressant)</i>                                                                                   | 76       | .84                      | .69-.96              |
| <b>Prescriber level</b>                                                                                                            |          |                          |                      |
| Percentage of CMUC-covered patients <sup>c</sup> (%; reference: <5)                                                                |          |                          |                      |
| 5-23                                                                                                                               | 7164     | 1.01                     | .97-1.04             |
| >23                                                                                                                                | 5348     | 1.07                     | 1.02-1.11            |

<sup>a</sup> Estimated odds ratio were corrected with the method of Zhang and Yu to estimate relative risks (RR) with their 95% confidence intervals (CIs). Results of multilevel logistic regression analyses adjusted for 1) individual level: gender, age number of consultations with private general practitioners and psychiatrists in 2008-2009, chronic somatic illness, chronic psychiatric illness, coprescription of antipsychotics and/or lithium, coprescription of anxiolytics and/or hypnotic; 2) prescriber level: gender, age, annual mean expenditure due to medication prescriptions dispensed/patient in 2008-2009, percentage of patients aged 60 years or more, percentage of patients with chronic illness.

<sup>b</sup> New antidepressant treatment: no antidepressant claim in the 6 months before the index claim.

<sup>c</sup> CMUC: Couverture maladie universelle complémentaire (Complementary Universal Health Insurance program covering persons with very low income.

<sup>d</sup> SSRIs: Selective serotonin re-uptake inhibitors.

<sup>e</sup> The categories "Miscellaneous other antidepressants" and "Other cases ( $\geq 2$  types of antidepressant)" have been merged because no case of discontinuation was found in the latter category.
